# Supplementary material
Source: PubMed Central journal article supplement (PMC5748228)
Supplement: pnas.201718471SI.pdf [file pnas.201718471SI.pdf]

# Supporting Information

Lees et al. 10.1073/pnas.1718471115

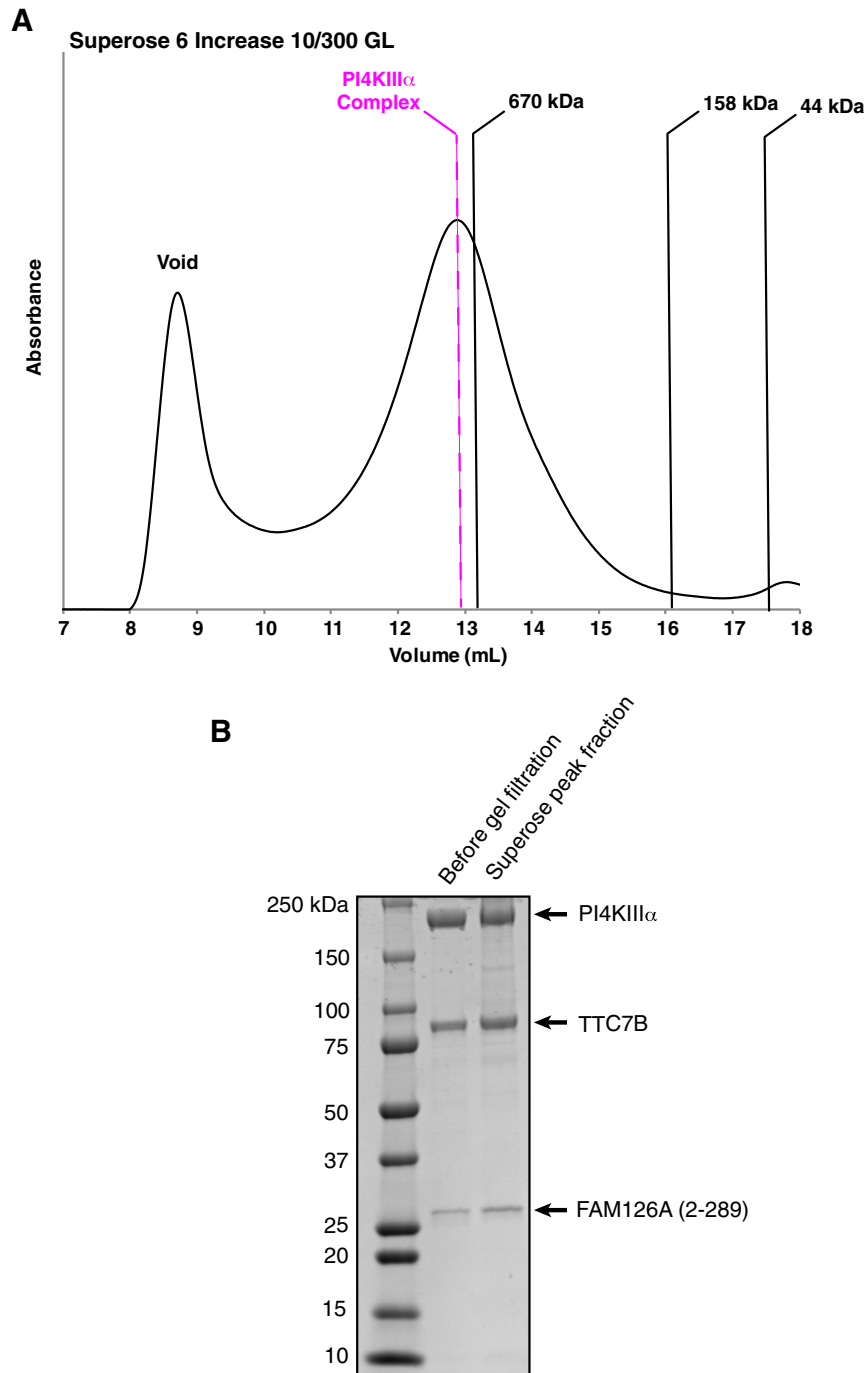

**Fig. S1.** The PI4KIII $\alpha$ /TTC7B/FAM126A complex behaves as a homodimer in solution. (A) Purified PI4KIII $\alpha$ /TTC7B/FAM126A complex was analyzed on a Superose 6 Increase 10/300 GL size exclusion column. Peak elution volumes for the complex, as well as molecular weight standards, are indicated. The estimated molecular weight of the complex, based on this analysis, is ~700 kDa. (B) Superose 6 peak fractions contain all three complex components in equal stoichiometry. Anti-FLAG-purified PI4KIII $\alpha$ /TTC7B/FAM126A complex was analyzed by SDS/PAGE before and after gel filtration on the Superose 6 Increase column. The complex components are present in approximately equal amounts after gel filtration. Note slight enrichment of TTC7 and FAM126 due to removal of excess PI4KIII $\alpha$ .

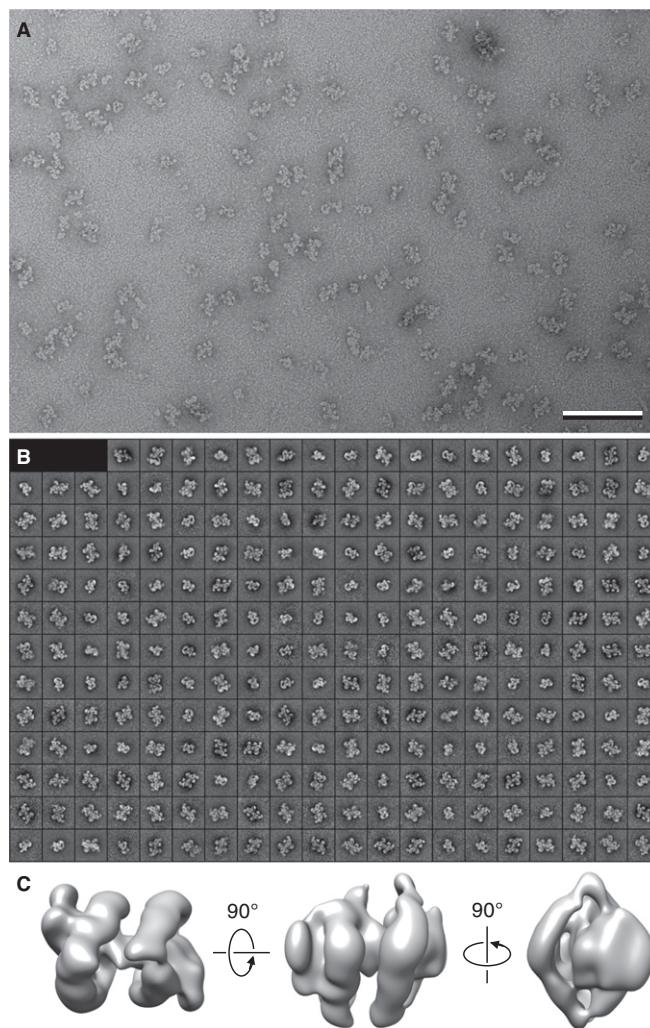

**Fig. S2.** Initial model generation using images of negatively stained PI4KIII $\alpha$ /TTC7/FAM126 complex. (A) Representative image of negatively stained PI4KIII $\alpha$ /TTC7/FAM126 complex. (Scale bar, 100 nm.) (B) The 257 2D class averages obtained with the iterative stable alignment and classification (ISAC) algorithm. Side length of individual averages is 42 nm. (C) Different views of the initial model generated with the validation of individual parameter reproducibility (VIPER) algorithm using the averages shown in B.











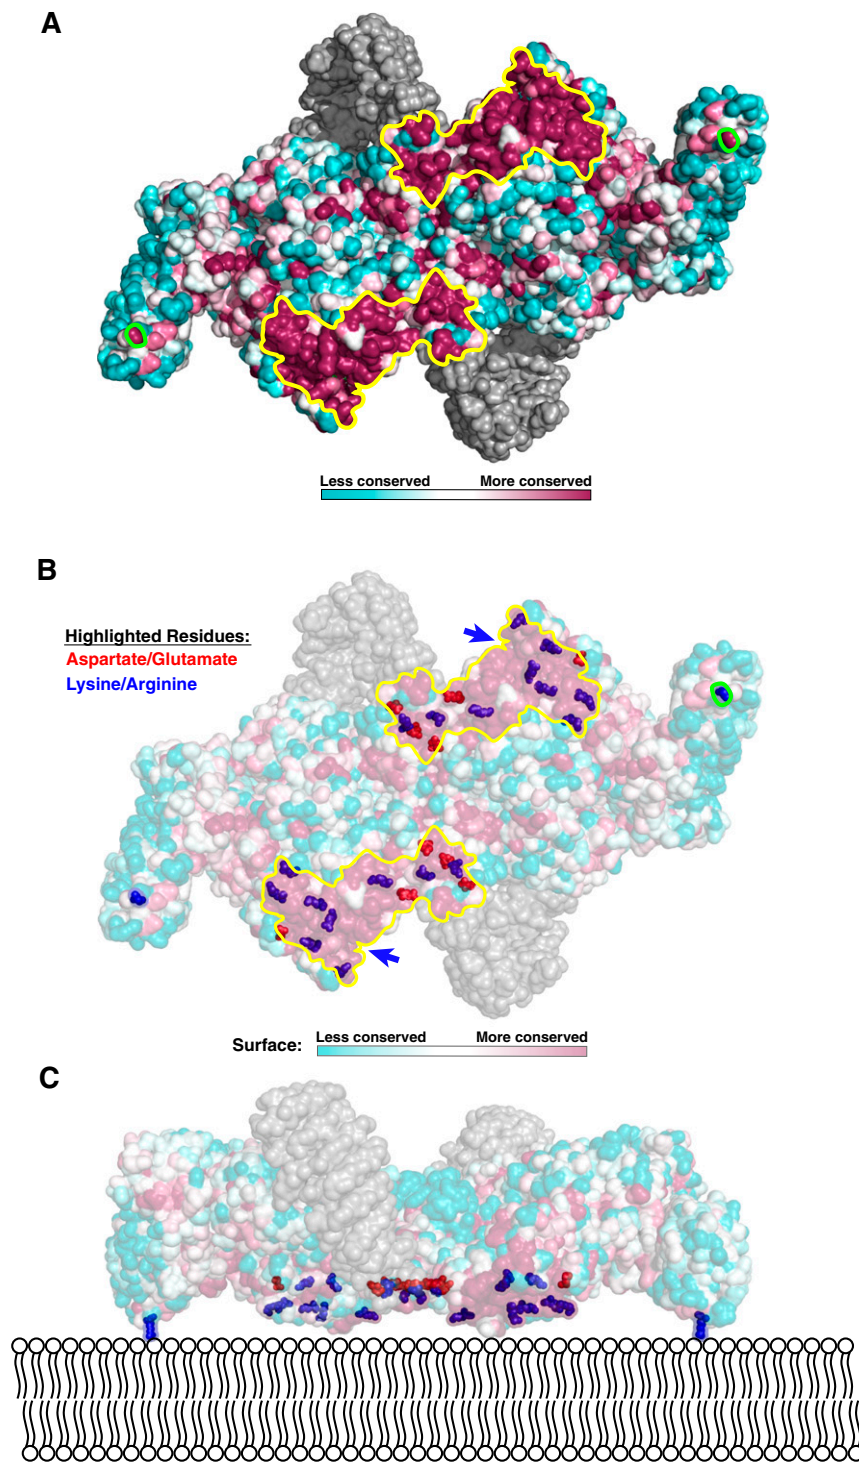

**Fig. S7.** The conserved membrane-proximal surface of PI4KIII $\alpha$  complex carries an excess of basic residues. (A) Solvent-accessible surface representation of the PI4KIII $\alpha$  complex, colored by sequence conservation. Hotspots of conservation in close proximity to the membrane are outlined on PI4KIII $\alpha$  and TTC7B in yellow and green, respectively. (B) Positively and negatively charged amino acids occurring in the highlighted areas, identical to those in A, are indicated in sphere representation, colored blue and red, respectively. The overall structure of the complex, colored by conservation, is overlaid as a semitransparent surface. The active site cleft of each catalytic domain is indicated by a blue arrow. (C) Same as in B, but rotated by 90°, juxtaposed with a cartoon representation of the membrane, approximately to scale, to indicate relative distance of the highlighted residues from the membrane.
